## Spectral graph theory of brain oscillations

Ashish Raj<sup>1,2\*</sup>, Chang Cai<sup>1</sup>, Xihe Xie<sup>3</sup>, Eva Palacios<sup>1</sup>, Julia Owen<sup>4</sup>,  
Pratik Mukherjee<sup>1,2</sup> & Srikantan Nagarajan<sup>1,2\*</sup>

<sup>1</sup>Department of Radiology and Biomedical Imaging, University of California, San Francisco, CA

<sup>2</sup>Department of Bioengineering and Therapeutic Sciences, University of California, San Francisco, CA

<sup>3</sup>Department of Neuroscience, Weill Cornell Graduate School of Medical Sciences, Weill Cornell Medicine, New York, NY

<sup>4</sup>Department of Radiology, University of Washington, Seattle, WA

\* Address Correspondence to:

Srikantan Nagarajan, PhD  
Department of Radiology and Biomedical Imaging  
University of California at San Francisco  
513 Parnassus Avenue S362, San Francisco, CA 94143-0628  
Email: [sri@ucsf.edu](mailto:sri@ucsf.edu)

&

Ashish Raj, PhD  
Department of Radiology and Biomedical Imaging  
University of California, San Francisco  
185 Berry St, Suite 370, San Francisco, CA 94143-0946  
Email: [ashish.raj@ucsf.edu](mailto:ashish.raj@ucsf.edu)

**Keywords:** spectral graph theory, connectomes, magnetoencephalography, brain activity, alpha rhythm

**Short title:** Linear graph spectral model of brain oscillations

**Author contributions:**

Conceived the study: AR, PM, SN

Wrote model algorithm: AR

Experimental data acquisition and analysis: CC, XX, EP, JO

Software implementation: AR, CC, XX

Wrote manuscript: AR, XX, SN

Edited / improved manuscript: AR, CC, XX, EP, JO, PM, SN

**Competing Interests statement:** All authors declare that they do not have a competing interest as it pertains to this study.

## Abstract

The relationship between the brain's structural wiring and the functional patterns of neural activity is of fundamental interest in computational neuroscience. We examine a hierarchical, linear graph spectral model of brain activity at mesoscopic and macroscopic scales. The model formulation yields an elegant closed-form solution for the structure-function problem, specified by the graph spectrum of the structural connectome's Laplacian, with simple, universal rules of dynamics specified by a minimal set of global parameters. The resulting parsimonious and analytical solution stands in contrast to complex numerical simulations of high dimensional coupled non-linear neural field models. This spectral graph model accurately predicts spatial and spectral features of neural oscillatory activity across the brain and was successful in simultaneously reproducing empirically observed spatial and spectral patterns of alpha-band (8-12 Hz) and beta-band (15-30Hz) activity estimated from source localized scalp magneto-encephalography (MEG). This spectral graph model demonstrates that certain brain oscillations are emergent properties of the graph structure of the structural connectome and provides important insights towards understanding the fundamental relationship between network topology and macroscopic whole-brain dynamics.

## **Significance Statement**

The relationship between the brain's structural wiring and the functional patterns of neural activity is of fundamental interest in computational neuroscience. We examine a hierarchical, linear graph spectral model of brain activity at mesoscopic and macroscopic scales. The model formulation yields an elegant closed-form solution for the structure-function problem, specified by the graph spectrum of the structural connectome's Laplacian, with simple, universal rules of dynamics specified by a minimal set of global parameters. This spectral graph model demonstrates that certain brain oscillations are emergent properties of the graph structure of the structural connectome and provides important insights towards understanding the fundamental relationship between network topology and macroscopic whole-brain dynamics.

## Introduction

### The Structure-Function Problem in Neuroscience

It is considered paradigmatic in neuroscience that the brain's structure at various spatial scales is critical for determining its function. In particular, the relationship between the brain's *structural wiring* and the *functional* patterns of neural activity is of fundamental interest in computational neuroscience. Brain structure and function at the scale of macroscopic networks, i.e. amongst identifiable GM regions and their long-range connections through WM fiber bundles, can be adequately measured using current non-invasive measurement techniques. Fiber architecture can be measured from diffusion tensor imaging (DTI) followed by tractography algorithms <sup>1,2</sup>. Similarly, brain function manifested in neural oscillations can be measured non-invasively using magnetoencephalography (MEG) and reconstructed across whole-brain networks. Does the brain's white matter wiring structure constrain functional activity patterns that arise on the macroscopic network or graph, whose nodes represent gray matter regions, and whose edges have weights given by the structural connectivity (SC) of white matter fibers between them? We address this critical open problem here, as the structural and functional networks estimated at various scales are not trivially predictable from each other <sup>3</sup>.

Although numerical models of single neurons and local microscopic neuronal assemblies, ranging from simple integrate-and-fire neurons to detailed multi-compartment and multi-channel models <sup>4-8</sup> have been proposed, it is unclear if these models can explain structure-function coupling at meso- or macroscopic scales. At one extreme, the Blue Brain Project <sup>9,10</sup> seeks to model in detail all  $10^{11}$  neurons and all their connections in the brain. Indeed spiking models linked up via specified synaptic connectivity and spike timing dependent plasticity rules were found to produce regionally and spectrally organized self-sustaining dynamics, as well as wave-like propagation similar to real fMRI data <sup>11</sup>. However, it is unclear whether such efforts will succeed in providing interpretable models at whole-brain scale <sup>12</sup>.

Therefore the traditional computational neuroscience paradigm at the microscopic scale does not easily extend to whole-brain macroscopic phenomena, as large neuronal ensembles exhibit emergent properties that can be unrelated to individual neuronal behavior <sup>13-18</sup>, and are instead largely governed by long-range connectivity <sup>19-22</sup>. At this scale, graph theory involving network statistics can phenomenologically capture structure-function relationships <sup>23-25</sup>, but do not explicitly embody any details about neural physiology <sup>14,15</sup>. Strong correlations between functional and structural connections have also been observed at this scale <sup>3,26-32</sup>, and important graph properties are shared by both SC and FC networks, such as small worldness, power-law degree distribution, hierarchy, modularity, and highly connected hubs <sup>24,33</sup>.

A more detailed accounting of the structure-function relationship requires that we move beyond statistical descriptions to mathematical ones, informed by computational models of neural activity. Numerical simulations are available of mean field <sup>17,34,35</sup> and neural mass <sup>22,36</sup> approximations of the dynamics of neuronal assemblies. By coupling many such neural field or mass models (NMMs) using anatomic connectivity information, it is possible to generate via large-scale stochastic simulations a rough picture of how the network modulates local activity at the global scale to allow the emergence of coherent functional networks <sup>22</sup>. However, simulations are unable to give an analytical (i.e. closed form) encapsulation of brain dynamics and present an interpretational challenge in that behavior is only deducible indirectly from thousands of trial runs of time-consuming simulations. Consequently, the essential minimal rules of organization and dynamics of the brain remain unknown. Furthermore, due to their

nonlinear and stochastic nature, model parameter inference is ill-posed, computationally demanding and manifest with inherent identifiability issues<sup>37</sup>.

How then do stereotyped spatiotemporal patterns emerge from the structural substrate of the brain? How will disease processes perturb brain structure, thereby impacting its function? While stochastic simulations are powerful and useful tools, they provide limited neuroscientific insight, interpretability and predictive power, especially for the practical task of inferring macroscopic functional connectivity from long-range anatomic connectivity. Therefore, there is a need for more direct models of structural network-induced neural activity patterns – a task for which existing numerical modeling approaches, whether for single neurons, local assemblies, coupled neural masses or graph theory, are not ideally suited. Here we use a spectral graph model to demonstrate that the spatial distribution of certain brain oscillations are emergent properties of the spectral graph structure of the structural connectome. Therefore we also explore how the chosen connectome alters the functional activity patterns they sustain.

### **A hierarchical, analytic, low-dimensional and linear spectral graph theoretic model of brain oscillations**

We present a linear graph model capable of reproducing empirical macroscopic spatial and spectral properties of neural activity. We are interested specifically in the transfer function induced by the macroscopic structural connectome, rather than in the behavior of local neural masses. Therefore we seek an explicit formulation of the frequency spectra induced by the graph, using the eigen-decomposition of the structural graph Laplacian, borrowing heavily from **spectral graph theory** used in diverse contexts including clustering, classification, and machine learning<sup>38–41</sup>. This theory conceptualizes brain oscillations as a linear superposition of eigenmodes. These eigen-relationships arise naturally from a biophysical abstraction of fine-scaled and complex brain activity into a simple linear model of how mutual dynamic influences or perturbations can spread within the underlying structural brain network, a notion that was advocated previously<sup>30,42,43</sup>. We had previously reported that the brain network Laplacian can be decomposed into its constituent “eigenmodes”, which play an important role in both healthy brain function<sup>30,31,44–46</sup> and pathophysiology of disease<sup>44,47–49</sup>.

We show here that a graph-spectral decomposition is possible at all frequencies, ignoring non-linearities that are operating at the local (node) level. Like previous NMMs, we lump neural populations at each brain region into neural masses, but unlike them we use a linearized (but frequency-rich) local model – see **Figure 1A**. The macroscopic connectome imposes a linear and deterministic modulation of these local signals, which can be captured by a *network transfer function*. The sequestration of local oscillatory dynamics from the macroscopic network in this way enables the characterization of whole brain dynamics deterministically in closed form in Fourier domain, via the eigen-basis expansion of the network Laplacian. As far as we know, this is the first closed-form analytical model of frequency-rich brain activity constrained by the structural connectome.

We applied this model to and validated its construct against measured source-reconstructed MEG recordings in healthy subjects. The model closely matches empirical spatial and spectral MEG patterns. In particular, the model displays prominent alpha and beta peaks, and, intriguingly, the eigenmodes corresponding to the alpha oscillations have the same posterior-dominant spatial distribution that is repeatedly seen in eyes-closed alpha power distributions. In contrast to existing less parsimonious models in the literature that invoke spatially-varying parameters or local rhythm generators, to our knowledge, this is the first account of how the spectral graph structure of the structural connectome can

parsimoniously explain the spatial power distribution of alpha and beta frequencies over the entire brain measurable on MEG.

## Results

### Closed form solution of steady state spectra

The steady state spectral response induced by the connectome at angular frequency  $\omega$ , can be expressed as a summation over the eigenmodes  $\mathbf{u}_i(\omega)$  and eigenvalues  $\lambda_i(\omega)$  of the graph Laplacian  $\mathcal{L}(\omega)$ :

$$\mathbf{X}(\omega) = \sum_i \frac{\mathbf{u}_i(\omega)\mathbf{u}_i^H(\omega)}{j\omega + \frac{1}{\tau_G}\lambda_i(\omega)F_e(\omega)} H_{local}(\omega)\mathbf{P}(\omega) \quad (1)$$

$\tau_G$  is a time constant,  $F_e(\omega)$  is a gamma-shaped neural response function, and  $H_{local}(\omega)$  is a linearized-lumped local spectral response (derivation can be found in Methods). The spectral-domain output  $\mathbf{X}(\omega)$  and input  $\mathbf{P}(\omega)$  are vector-valued variables. This steady state model of brain activity includes only 7 global model parameters.

### Graph Laplacian eigenmodes mediate a diversity of frequency responses

First, we demonstrate the spectra produced by graph eigenmodes as per our theory. **Figure 1C** shows the eigen-spectrum of the complex Laplacian, with eigenvalue magnitude ranging from 0 to 1. Small eigenvalues undergo a larger shift due to frequency, while the large ones stay more stable and tightly clustered around the nominal eigenvalue (i.e. at  $\omega = 0$ ). Each eigenmode produces a frequency response based on its frequency-dependent eigenvalue (**Figure 1D, E**). **Figure 1D** shows the transit in the complex plane of a single eigenmode's frequency response, starting at low frequencies in the bottom right quadrant, and moving to the upper left quadrant at high frequencies. The magnitude, given by distance from origin, suggests that most eigenmodes have two prominent lobes, roughly corresponding to alpha and beta rhythms, respectively. In contrast, the lowest few eigenmodes start off far from the origin, indicative of a low-pass response. The magnitude of these complex-valued curves shown in figure **1E** reinforces these impressions, with clear alpha and beta peaks, as well as slower rhythms of the lowest eigenmodes.

The spatial patterns of the first 5 eigenmodes of  $\mathcal{L}(\omega)$ , evaluated at the alpha peak of 10 Hz, are shown in **Figure 1F**. The first 4 eigenmodes  $\mathbf{u}_1 - \mathbf{u}_4$ , give strong alpha frequency responses, and in turn are strongly distributed spatially in posterior areas. But they also include other regions and prominently resemble many elements of the **default mode network** and the **structural core** of the human connectome, especially  $\mathbf{u}_5$ .  $\mathbf{u}_4$  resembles the **sensorimotor network**. While these modes are highly consistent and reproducible, higher modes are increasingly sensitive to axonal velocity and frequency (not shown here).

Since the model relies on connectome topology, we demonstrate in **Figure 2** that different connectivity matrices produce different frequency responses: A) the individual's structural connectivity matrix, B) HCP average template connectivity matrix, C) uniform connectivity matrix of ones, D) a randomly generated matrix, E) and F) are randomly generated matrices with 75% and 95% sparsity respectively. All modeled power spectra show a broad alpha peak at around 10 Hz and a narrower beta peak at around 20 Hz. This is expected, since these general spectral properties are governed by the local linearized neural mass model. The alpha peak is predominantly contained in the low eigenmodes, up to eigen-index 10 or so. Although the alpha and beta peaks are innately present under default parameters in **Figure**

1, once we optimize parameters, the peaks become stronger. However, it is important to note that different eigenmodes accommodate a diversity of frequency responses; for instance, the lowest eigenmodes show a low-frequency response with no alpha peak whatsoever. In the frequency responses from biologically realistic individual and HCP template connectomes, there is a diversity of spectral responses amongst eigenmodes that is lacking in the response produced by the unrealistic uniform and randomized matrices. Since graph topology appears so critical to the power spectrum it induces, we explored whether and how sparsity of random graphs mediates spectral power (**Figure 2D-F**). At incrementally increasing sparsity levels, the diversity of spectral responses of different eigenmodes increases and approaches that of realistic connectomes. Therefore, graph eigenmodes induce unique and diverse frequency responses that depend strikingly on the topology of the graph.

### Spectral distribution of MEG power depends on model parameters but not connectivity

Network eigenmodes exhibit strong spatial patterning in their frequency responses, even with identical local oscillations (**Figure 3**). We evaluated the model spectral response using the subject-specific  $C^{individual}$  matrices of 4 representative subjects (**Figure 3A**). The model power spectra strikingly resemble empirical MEG spectra, correctly displaying both the alpha and beta peaks on average, and similar regional variability as in real data.

Regional averages of empirical and modeled power spectra of the entire group after full parameter optimization over individual subjects are shown in figure 3B. The model closely replicates the observed power spectrum (red circles) equally well with both  $C^{individual}$  (black triangles) and  $C^{template}$  (purple triangles). Thus, in most cases we can safely replace the subject-specific connectome with the template connectome. In contrast, when non-optimized default parameters were used (dark green triangles), it resulted in a bad fit, especially at high frequencies, suggesting that individualized parameter optimization is essential to produce realistic spectra. We also examined the model behavior for a random connectome (bright green triangles) or a distance-based connectome (blue triangles) was chosen with identical sparsity to the actual connectome, and found that with optimized parameters the average spectra could be accounted for by these connectomes but as we show below these connectomes do not capture the frequency spectra across individual subjects. We found maximum *a posteriori* estimates for parameters under a flat non-informative prior. A simulated annealing optimization algorithm was used for estimation and provided a set of optimized parameters  $\{\tau_e, \tau_i, \tau_c, g_{ei}, g_{ii}, \alpha, \nu\}$ : (see supplementary **Table 1**). **Figure 4A** shows violin plots of the optimized values, indicating that the range is adequate for parameter exploration. The time constants  $\tau_e, \tau_i$  showed tight clustering but the rest of the parameters showed high variability across subjects. The optimal parameters are in a biologically plausible range, similar to values reported in numerous neural mass models. The annealing algorithm aimed to maximize a cost function proportional to the posterior likelihood of the model, and was quantified by the Pearson's correlation between MEG and modeled spectra ("Spectral correlation"). The convergence plots shown in **Figure 4B**, one curve for each subject, indicates substantial improvement in cost function from default choice as optimization proceeds. The distribution of optimized spectral correlations is shown in **4C**. Therefore, with the graph spectral model, the overall regional spectra appear to be dependent both on global model parameters and on the actual structural connectome. Performance is better for optimized parameters than with average parameters. As indicated by Panel **E**, replacing individual connectomes by the template HCP connectome did not cause a discernible reduction of performance.

As another benchmark for comparison, a non-linear neural mass model<sup>35,50</sup> using our in-house MATLAB implementation<sup>37</sup>, was generally able to produce characteristic alpha and beta frequency peaks (yellow) but this model does not resemble empirical wideband spectra. Note that no regionally-varying NMM parameters were used in order to achieve a proper comparison with our model, but both models were optimized with the same algorithm. Nevertheless, these data confirm our intuition that the average spectral power signal can be produced by almost any neural model, whereas its regional variations around the canonical spectrum are presently being modeled via the connectome. Finally, no model is capable of reproducing higher frequencies in the higher beta and gamma range seen in MEG, since by design and by biophysical intuition these frequencies arise from local neural assemblies rather than from modulation by macroscopic networks.

### **Graph spectral model recapitulates the spatial distribution of MEG power**

Next, we establish that the model can correctly reproduce region-specific spectra, even though it uses identical local oscillations. We integrated the spectral area in the range 8-12 Hz for alpha and 13-25 Hz for beta, of each brain region separately. We define “*spatial correlation*” (as compared to spectral correlation above) as Pearson’s R between the *regional distribution* of empirical MEG and model-predicted power within a given frequency band.

**Specific eigenmodes capture spatial distributions of alpha and beta band activity.** We plotted the spatial correlation achieved by each eigenmode against empirical MEG regional alpha and beta power, averaged over all subjects in **Figure 5A**. In **Supplementary Figure 1** we show these spatial correlation curves for all 36 subjects. Only a small number of eigenmodes are tuned to each power band; alpha is generally better captured by low eigenmodes while beta by middle eigenmodes. A scatter plot of all eigenmodes’ alpha and beta power spatial correlation is shown in panel **B**, suggesting that when an eigenmode is correlated to alpha power, it is roughly anti-correlated to beta power. This correlation-of-correlations is highly significantly negative ( $r=-0.255$ ,  $p<0.0001$ ). While on average, individual eigenmodes are not highly predictive of alpha or beta, in individual subjects they have much higher R values up to 0.5. **Figure 5C, D** show the spatial pattern of the most spatially correlated eigenmode for alpha (#3) and beta (#33) respectively. These selected eigenmodes have the expected posterior distribution for alpha and are widespread for beta. Panel **E** shows a histogram of the correlation between the alpha band and beta band spatial correlations. It can be seen that across all subjects’ alpha and beta band spatial correlation curves for the eigenmodes are in turn anti-correlated. Panel **F** shows histograms of the spatial correlations across subjects of the eigenmode with maximal spatial correlation with empirical alpha (green) and the same eigenmode’s spatial correlation with empirical beta (blue). Again, we can see a clear anti-correlation. Together, these results confirm that graph eigenmodes might be tuned to specific frequencies, and their spatial patterns might govern the spatial presentation of different brain rhythms.

**Figure 6** depicts the spatial distribution of alpha band power (8-12 Hz) over the entire brain, and **Figure 7** shows spatial distribution of beta power (13 – 25 Hz), for a representative subject. Regions are color coded by regional power scaled by mean power over all regions. A different “glass brain” rendering is shown in **Supplementary Figures 2,3**.

**Alpha power distribution.** The alpha power was best modeled by a combination of the 10 best-matching eigenmodes ( $R = 0.53$ ). The posterior and occipital dominance of alpha power is clearly observed predicted alpha distribution, with strong effect size in temporal, occipital



and medial posterior areas. However, the model predicts some lateral frontal involvement that is not observed in real data. The two strongest eigenmodes that contribute to the summed model (bottom two rows) also show very similar spatial organization. **Beta power distribution.** Empirical beta power (**Figure 7** top) is spread throughout the cortex, especially frontal and premotor cortex. A combination of five best matching eigenmodes produced the best model match to the source localized pattern ( $R = 0.57$ ). The two best-matching eigenmodes have Pearson's correlation coefficients of 0.42 and 0.41.

**Alternate non-linear model.** The Wilson-Cowan neural mass model did not succeed in correctly predicting the spatial patterns of alpha or beta power – see **Supplementary Figure 4**. This could be because in our implementation we enforced uniform local parameters with no regional variability. However, this is the appropriate comparison, since our proposed model also does not require regionally-varying parameters.

**Peak model performance over sorted, selected eigenmodes.** Since only a few eigenmodes appear to contribute substantially, we hypothesized that spatial correlations could be improved by selecting a subset of eigenmodes. Therefore, we developed a sorting strategy whereby we first rank the eigenmodes in descending order of spatial correlation for a given subject and given frequency band. Then we perform summation over only these eigenmodes according to Eq (10), each time incrementally adding a new eigenmode to the sum. The spatial correlation of these “sorted-summed” eigenmodes against empirical MEG data are plotted in **Figure 8A, B** as a function of increasing number of eigenmodes. **Figure 8A** gives the spatial correlation curves for alpha band and **8B** for beta band; one curve for each subject. The thick solid curves represent the average over all subjects. The spatial correlation initially increases as we add more well-fitting eigenmodes, but peaks around 10 for alpha and 5 eigenmodes for beta power, and begins declining thereafter. Addition of the remaining eigenmodes only serves to reduce the spatial correlation. This behavior is observed in almost all subjects we studied.

The distribution of peak spatial correlations, using optimized parameters and individual connectomes of all subjects is plotted in **panel C**, as well as three alternatives all with optimized parameters: a) NMM, b) spectral graph model with 900 instances of 80% sparse randomly generated connectomes, and c) spectral graph model with a geodesic distance based connectome. The proposed model gives very strong spatial correlation in alpha band ( $r$  distribution centered at 0.6), and NMM gives very poor correlation ( $r$  centered at 0). Interestingly, the random connectomes and geodesic distance based connectome also appear to have some ability to capture these spatial patterns ( $r$  centered at 0.4 and 0.2 respectively), perhaps due to the implicit search for best performing eigenmodes, which on average will give at least a few eigenmodes that look like MEG power purely by chance. **Panel D** shows analogous results for beta band spatial power correlations. Again our model does the best ( $r$  distribution centered at 0.5), but its comparative performance against alternate approaches is not as striking as in alpha.

Collectively, we conclude that the graph model is able to fit both the spectral and spatial features of empirical source localized MEG data, and that the optimal fits performed on individual subjects occurs at widely varying subject-specific parameter choices.

## Discussion

The proposed hierarchical graph spectral model of neural oscillatory activity is a step towards understanding the fundamental relationship between network topology and the macroscopic whole-brain dynamics. The objective is not just to model brain activity phenomenologically, but to analytically derive the mesoscopic laws that drive macroscopic dynamics. This model of the structure-function relationship has the following key distinguishing features: *1) Hierarchical*: the model's complexity depends on the level of hierarchy being modeled: complex, non-linear and chaotic dynamics can be accommodated at the local level, but linear graph model is sufficient at the macro-scale. *2) Graph-based*: Macroscopic dynamics is mainly governed by the connectome, hence linear approximations allow the steady-state frequency response to be specified by the graph Laplacian eigen-decomposition, borrowing heavily from **spectral graph theory**<sup>38-41</sup>. *3) Analytic*: The model is available in closed form, without the need for numerical simulations. *4) Low-dimensional and parsimonious*: Simple, global and universal rules specified with a few parameters, all global and apply at every node, are able to achieve sufficiently complex dynamics. The model is incredibly easy to evaluate, taking no more than a few seconds per brain and to infer model parameters directly from a subject's MEG data. The optimized model matches observed MEG data quite well. No time-consuming simulations of coupled neural masses or chaotic oscillators were needed; indeed, the latter greatly underperformed our model. We report several novel findings with potentially important implications, discussed below.

### Recapitulating regional power spectra at all frequencies

Our main result is the robust demonstration of the model on 36 subjects' MEG data. The representative examples shown in Figures 3,6-8 indicate that the graph model recapitulates the observed source localized MEG power spectra for the 68 parcellated brain regions, correctly reproducing the prominent alpha and beta peaks. For each region, the model is also correctly able to predict the full bandwidth power spectra, including the  $1/\omega$  fall-off over the entire frequency range of interest.

### Revealing sources of heterogeneity in brain activity patterns

The match between model and data is strongest when the model uses empirical macroscopic connectomes obtained from healthy subjects' diffusion weighted MRI scans, followed by tractography. The use of "null" connectomes - uniform connectivity of ones and randomized connectivity matrix, respectively, did far worse than actual human connectomes (Figure 8), supporting the fact that the latter is the key mediator of real brain activity. The match was not significantly different when using a template HCP connectome versus the individual subject's own connectomes (Figures 3E, 4C, D), suggesting that, for the purpose of capturing the gross topography of brain activity, it is sufficient to use a template connectome, and disregard individual variability.

However, this does not mean that the model is incapable of capturing individual variability: indeed, we designed a comprehensive parameter optimization algorithm on individual subjects' MEG data of a suitably defined cost function based on Pearson R statistic as a way to capture all relevant spectral features. Using this fitting procedure, we were able to obtain the range of optimally-fitted parameters across the entire study cohort. As shown in Figure 4A, the range is broad in most cases, implying that there is significant inter-subject variability of model parameters, even if a template connectome is used for all. We tested the possibility that a group-averaged parameter set might also succeed in matching real data on individuals. But as shown in Figure 3E, this was found to be a poor choice, supporting the key

role of individual variability of model parameters (but not variability in the connectome).

### Macroscopic brain rhythms are governed by the connectome

A predominant view assumes that different brain rhythms are produced by groups of neurons with similar characteristic frequencies, which might synchronize and act as “pacemakers.” How could this view explain why alpha and beta power are spatially stereotyped across subjects, and why the alpha signal is especially prominent in posterior areas? Although practically any computer model of cortical activity can be tuned, with suitable parameter choice, to oscillate at alpha frequency, e.g. <sup>5,16,20,22,51–53</sup>, none of them are able to parsimoniously recapitulate the posterior origin of alpha. Thus the prominence of posterior alpha might be explained by the hypothesized existence of alpha generators in posterior areas. Indeed, most oscillator models of local dynamics are capable of producing these rhythms at any desired frequency <sup>5,53–56</sup>, and therefore it is common to tweak their parameters to reproduce alpha rhythm. Local networks of simulated multicompartmental neurons can produce oscillations in the range 8–20 Hz <sup>5</sup>, and, in a non-linear continuum theory, peaks at various frequencies in the range 2–16Hz were obtained depending on the parameters <sup>55</sup>. Specifically, the role of thalamus as pacemaker has motivated thalamocortical models <sup>11,16</sup> that are capable of resonances in various ranges. Neural field models of the thalamocortical loop <sup>16</sup> can also predict slow-wave and spindle oscillations in sleep, and alpha, beta, and higher-frequency oscillations in the waking state. In these thalamocortical models, the posterior alpha can arise by postulating a differential effect in weights of the posterior versus anterior thalamic projections, e.g. <sup>52</sup>. Ultimately, hypotheses requiring local rhythm generators suffer from lack of parsimony and specificity: a separate pacemaker must be postulated for each spectral peak at just the right location <sup>57</sup>.

An alternative view emerges from our results that macroscopic brain rhythms are governed by the structural connectome. Even with global model parameters, using the exact same local cortical dynamics captured by the local transfer function  $H_{local}(\omega)$ , driven by identically distributed random noise  $\mathbf{P}(\omega)$ , our model is capable of predicting prominent spectral (Figure 3) and spatial (Figures 6,7) patterning that is quite realistic. This is especially true in the lower frequency range: indeed the model correctly predicts not just the frequency spectra in alpha and beta ranges, but also their spatial patterns – i.e. posterior alpha and distributed but roughly frontal beta. Although this is not definitive proof, it raises the intriguing possibility that the macroscopic spatial distribution of the spectra of brain signals does not require spatial heterogeneity of local signal sources, nor regionally variable parameters. Rather, it implies that the most prominent patterning of brain activity (especially alpha) may be governed by the topology of the macroscopic network rather than by local, regionally-varying drivers. Nevertheless, a deeper exploration is required of the topography of the dominant eigenmodes of our linear model, in order to understand the spatial gradients postulated previously <sup>16,52</sup>.

### Emergence of linearity from chaotic brain dynamics

The non-linear and chaotic dynamics of brain signals may at first appear to preclude deterministic or analytic modeling of any kind. Yet, vast swathes of neuroscientific terrain are surprisingly deterministic, reproducible and conserved across individuals and even species. Brain rhythms generally fall within identical frequency bands and spatial maps <sup>4,16,33</sup>. Based on the hypothesis that the emergent behavior of long-range interactions can be independent of detailed local dynamics of individual neurons <sup>13–18</sup>, and may be largely governed by long-range connectivity <sup>19–22</sup>, we have reported here a minimal linear model of

how the brain connectome serves as a spatial-spectral filter that modulates the underlying non-linear signals emanating from local circuits. Nevertheless, we recognize the limitations of a linear model and its inability to capture inherent non-linearities across all levels in the system.

### Relationship to other work

One can view the proposed generative model as a biophysical realization of a dynamic causal model (DCM) <sup>58-62</sup> for whole brain electrophysiological activity but with very different goals, model dimensionality and inference procedures.

First, the goal of many prior efforts using DCMs is to examine effective connectivity in EEG, LFP and fMRI functional connectivity data, typically for smaller networks <sup>62,63</sup>, or dynamic effective connectivity <sup>64-66</sup>. Hence they address the second order covariance structures of brain activity. In particular, recent spectral DCM and regression DCM models <sup>67-69</sup> with local neural masses are formulated in the steady-state frequency-domain, and the resulting whole-brain cross-spectra are evaluated. The goals of these models are to derive model cross-spectra that define the effective connectivity in the frequency domain and are compared with empirical cross-spectra. Based on second-order sufficient statistics, these models attempt to derive effective connectivity from functional connectivity data. These DCMs have so far only been applied to small networks or to BOLD fMRI regime. In contrast, our goal is to examine the role of the eigenmodes of the structural connectome and their influence on power spectral distributions in the full MEG frequency range, and over the entire whole brain. In subsequent work, we intend to extend our efforts to examining effective connectivity but such an effort currently remains outside the scope of the work in this paper. Here, we focus on models that directly estimate the first order effects of observed power spectra and its spatial distributions and compare them with empirical MEG source reconstructions. Our primary motivation is to examine whether spatial distribution of observed power spectra can arise from graph structure of the connectome, hence our focus on the effects of model behavior as a function of the underlying structural connectome – whether it is individualized, template-based, uniform, random or distance based. DCM methods have not reported first order regional power spectra as we do here, nor have they explored how the structural connectome influences model spectral distributions.

Second, our model is more parsimonious compared to most of these above-mentioned models which have many more degrees of freedom because they often allow for regions and their interactions to have different parameters. Our model parameterization, with only a few global parameters, lends itself to efficient computations over fine-scale whole-brain parcellations, whereas most DCMs (with the exception of recent spectral and regression DCMs <sup>67-69</sup>) are suited for examining smaller networks but involve large effective connectivity matrices and region-specific parameters. Furthermore, parameters of our model remain grounded and interpretable in terms of the underlying biophysics, i.e. time constants and conductivities. In contrast, spectral and regression DCM models of cross-spectra have parameters that are abstract and do not have immediate biophysical interpretation.

The third major difference is in the emphasis placed on Variational Bayesian inference in DCM. Since our focus was on exploring model behavior over a small number of global parameters and a set of structural connectomes (whether anatomic or random) of identical sparsity and complexity, it was sufficient to use a maximum a posteriori estimation (MAP) procedure for Bayesian inference of our global model parameters with flat non-informative priors with pre-determined ranges based on biophysics. Like most DCM efforts our model

can be easily be extended to Variational Empirical Bayesian inference for parameter estimation, for instance to compute a full posterior of the structural connectivity matrix. In such a formulation, we can assume that the observed structural connectome will serve as the prior mean of the connectivity matrix. We reserve such extensions to our future work with this spectral graph model.

### **Other limitations and extensions**

The model currently examines resting-state activity, but future extensions will include prediction of functional connectivity, task-induced modulations of neural oscillations and causal modeling of external stimuli, e.g. transcranial magnetic and direct current stimulation. The current implementation does not incorporate complex local dynamics, but future work will explore using non-white internal noise and chaotic dynamics for local assemblies. This may allow us to examine higher gamma frequencies. Although our model incorporates latency information derived from path distances, we plan to explore path-specific propagation velocities derived from white matter microstructural metrics such as axon diameter distributions and myelin thickness. Future work will also examine the specific topographic features of the structural connectome that may best describe canonical neural activity spectra. Finally, we plan to examine the ability of the model to predict time-varying structure-function relationships.

### **Potential applications**

Mathematical encapsulation of the structure-function relationship can potentiate novel approaches for mapping and monitoring brain diseases such as autism, schizophrenia, epilepsy and dementia, since early functional changes are more readily and sensitively measured using fMRI and MEG, compared to structural changes. Because of the complementary sensitivity, temporal and spatial resolutions of diffusion MRI, MEG, EEG and fMRI, combining these modalities may be able to reveal fine spatiotemporal structures of neuronal activity that would otherwise remain undetected if using only one modality. Current efforts at fusing multimodalities are interpretive, phenomenological or statistical, with limited cognizance of underlying neuronal processes. Thus, the ability of the presented model to quantitatively and parsimoniously capture the structure-function relationship may be key to achieving true multi-modality integration.

### **Methods**

Details of the Spectral Graph Development model is described in supplementary methods. Equation (1) encapsulates the entire model, and it is deterministic and admits a closed form solution, once the graph Laplacian eigen spectrum is known. There are very few model parameters, seven in total:  $\forall \tau_e, \tau_i, \tau_G, \nu, g_{ii}, g_{ei}$ , which are all global and apply at every node. Note that the entire model is based on a single equation of graph dynamics, Eq (1), which is repeatedly applied to each level of the hierarchy. Here we used two levels: a mesoscopic level where connectivity is all-to-all, and a macroscopic level, where connectivity is measured from fiber architecture. In theory, this template could be refined into finer levels, where neural responses become increasingly non-linear, and connectivity becomes sparser and structured.

**Alternative benchmark model for comparison.** In order to put the proposed model in context, we also implemented for comparison a Wilson-Cowan neural mass model<sup>17,35,37,50</sup> with similar dimensionality. Although NMMs like this can and have been implemented with regionally varying local parameters, here we enforced uniform, regionally non-varying local parameters, meaning all parcellated brain regions shared the same local and global parameters. This is a fair comparison since the proposed model is also regionally non-varying.

The purpose of this exercise is to ascertain whether a non-regional NMM can also predict spatial power variations purely as a consequence of network transmission, like the proposed model, using the same model optimization procedure (see below). This NMM incorporates a transmission velocity parameter that introduces a delay based on fiber tract lengths extracted from diffusion MRI, but, unlike our model, does not seek to explicitly evaluate a frequency response based on these delays.

### Model Optimization

We computed maximum a posteriori estimates for parameters under a flat non-informative prior. A simulated annealing optimization algorithm was used for estimation and provided a set of optimized parameters  $\{\tau_e, \tau_i, \tau_c, g_{ei}, g_{ii}, \alpha, v\}$ . We defined a data likelihood or goodness of fit (GOF) as the Pearson correlation between empirical source localized MEG power spectra and simulated model power spectra, averaged over all 68 regions of a subject's brain. The proposed model has only seven global parameters as compared to neural mass models with hundreds of parameters, and is available in closed-form. To improve the odds that we capture the global minimum, we chose to implement a probabilistic approach of simulated annealing<sup>79</sup>. The algorithm samples a set of parameters within a set of boundaries by generating an initial trial solution and choosing the next solution from the current point by a probability distribution with a scale depending on the current "temperature" parameter. While the algorithm always accepts new trial points that map to cost-function values lower than the previous cost-function evaluations, it will also accept solutions that have cost-function evaluations greater than the previous one to move out of local minima. The acceptance probability function is  $1/(1 + \frac{\Delta}{e^{\max(T)}})$ , where  $T$  is the current temperature and  $\Delta$  is the difference of the new minus old cost-function evaluations. The initial parameter values and boundary constraints for each parameter are given in Supplementary Table 1. All simulated annealing runs were allowed to iterate over the parameter space for a maximum of  $N_p \times 3000$  iterations, where  $N_p$  is the number of parameters in the model. As a comparison, we performed the same optimization procedure to a regionally non-varying Wilson-Cowan neural mass model<sup>35,50</sup>. We have recently reported a similar simulated annealing optimization procedure on this model<sup>37</sup>.

### Acknowledgements

This work was supported by NIH grants R01EB022717, R01DC013979, R01NS100440, R01DC017696, and UCOP-MRP-17-454755. The template HCP connectome used in the preparation of this work were obtained from the MGH-USC Human Connectome Project (HCP) database (<https://ida.loni.usc.edu/login.jsp>). The HCP project is supported by the National Institute of Dental and Craniofacial Research (NIDCR), the National Institute of Mental Health (NIMH) and the National Institute of Neurological Disorders and Stroke (NINDS). Collectively, the HCP is the result of efforts of co-investigators from the University of Southern California, Martinos Center at Massachusetts General Hospital (MGH), Washington University, and the University of Minnesota.

## Figure Legends

**Figure 1: Approximating a non-linear simulation model of local neural assemblies with a linear model.** **A:** Conventional neural models typically instantiate a large assembly of excitatory and inhibitory neurons, which are modeled as fully connected internally. External inputs and outputs are gated through the excitatory neurons only, and inhibitory neurons are considered strictly local. The proposed linear model condenses these local assemblies into lumped linear systems  $f_e(t)$  and  $f_i(t)$ , Gamma-shaped functions having time constants  $\tau_e$  and  $\tau_i$  – see panel **B**. The recurrent architecture of the two pools within a local area is captured by the gain terms  $g_{ee}, g_{ii}, g_{ei}$ , indicating the loops created by recurrences within excitatory, inhibitory and cross-populations. **C:** The frequency-dependent behavior of the eigenvalue-spectrum of the complex Laplacian  $\mathcal{L}(\omega)$ . Each dot represents the absolute value of each eigenvalue  $\lambda(\omega)$ , plotted against the eigenvector index; its color represents the frequency  $\omega$  - low (blue) to high (yellow). Small eigenvalues show a larger shift due to frequency compared to large ones. **D:** Frequency response of each eigenmode plotted on the complex plane with default model parameters. Each curve represents the transit in the complex plane of a single eigenmode's frequency response, starting at low frequencies in the bottom right quadrant, and moving characteristically to the upper left quadrant at high frequencies. The magnitude of the response, given by the distance from the origin, suggests that most eigenmodes have two prominent lobes, roughly corresponding to alpha and beta rhythms, respectively. In contrast, the lowest few eigenmodes start off far from the origin, indicative of a low-pass response. **E:** Magnitude of the frequency response of each eigenmode reinforces these impressions more clearly. **F:** The spatial patterns of the top 5 eigenmodes of  $\mathcal{L}(\omega)$ , evaluated at the alpha frequency, 10 Hz. The first 4 eigenmodes  $\mathbf{u}_1 - \mathbf{u}_4$ , give strong alpha frequency responses, and in turn are strongly distributed spatially in posterior areas. Also see **Figure 5**. But they also include other regions and prominently resemble many elements of the **default mode network** and the **structural core** of the human connectome, especially  $\mathbf{u}_5$ .  $\mathbf{u}_4$  resembles the **sensorimotor network**. These low eigenmodes are highly consistent and reproducible, but higher ones increasingly depend on the axonal velocity and frequency, and are not shown here.

**Figure 2: Spectral graph model predictions of MEG spectra for one representative subject.** Top – Observed MEG power spectrum for each of the 68 parcellated brain regions. Average spectra for each brain region are shown in yellow, and the average spectrum across all brain regions is shown in red. The subsequent rows show each eigenmode's spectral magnitude response with model parameters optimized to match the observed spectrum ( $\tau_e = 0.0073$ ,  $\tau_i = 0.0085$ ,  $\tau_G = 0.0061$ ,  $g_{ei} = 2.9469$ ,  $g_{ii} = 4.4865$ ,  $\nu = 18.3071$  and  $\alpha = 0.4639$ ). **A:** Model using subject's individual structural connectivity matrix. **B:** Model using a template structural connectivity matrix obtained by averaging structural connectivity from 80 HCP subjects. **C:** Model using uniform connectivity matrix of ones. **D:** Model using randomized connectivity matrix with no sparsity. **E:** Model using randomized connectivity matrix with 75% sparsity. **F:** Model using randomized connectivity matrix with 95% sparsity. In all cases the connectome modulates the spectral response in delta-beta range, leaving the higher gamma frequencies unchanged. In general, mainly the low eigenmodes ( $\mathbf{u}_1 - \mathbf{u}_{20}$ ) appear to modulate the frequency response in any significant manner, and may be considered responsible for the diversity of spectra observed in the model.

**Figure 3: Spectral graph model correctly captures MEG spectra across subjects.** **A:** The observed spectra and spectral graph model's simulated spectra for four representative subjects. Red and yellow curves illustrate source localized average spectra and region-wise

spectra respectively, while black and cyan curves illustrate modeled average spectra and region-wise spectra respectively. **B:** The average observed spectrum for all 36 subjects is shown in red. For group level comparisons, the average simulated model spectra produced by optimized parameters with each individual subject's connectome is shown in black, optimized parameters with template connectome from HCP dataset is shown in purple, average parameters with individual subject's connectome is shown in golden green, optimized parameters with a connectome constructed by selecting 20% of the highest geodesic distance between ROI pairs is shown in blue, and optimized parameters with symmetric random connectomes with 80% sparsity is shown in green. Additionally, the neural mass model's average simulated power spectra with each subject's optimized global parameters and HCP template connectome is shown in pink.

**Figure 4: Model optimization via simulated annealing. A: Distribution of optimized model parameter values for all 36 subjects.** The simulated annealing algorithm performed model optimization for the set of parameters  $\{\tau_e, \tau_i, \tau_c, g_{ei}, g_{ii}, \alpha, \nu\}$  on all subjects. The optimized values for each parameter are shown in violin plots with each dot representing one subject. **Performance of optimization procedure. B:** Spectral Pearson correlation between model and source localized MEG spectra at each iteration of simulated annealing. Each curve shows the spectral correlation achieved by the model optimized for a single subject, averaged over all regions. Each accepted iteration increased the mean correlation values until the algorithm converged to a set of optimized parameters. **C:** Consistent with the color schemes of the simulated average spectra in Figure 3; the histogram of mean spectral correlation values for all 36 subjects with individual connectomes and optimized parameters is shown in black, geodesic distance based connectome with optimized parameters is shown in blue, symmetric random connectomes with optimized parameters is shown in green, and individual connectomes with average parameters is shown in golden green.

**Figure 5: Specific eigenmodes capture spatial distributions of alpha and beta band activity.** Here "spatial correlation" is defined as Pearson's R statistic of the correlation between the regional distribution of empirical MEG and model-predicted power within a given frequency band. **A:** Spatial correlation was computed for each eigenmode for all subjects in the alpha and beta bands, and the average spatial correlation for the eigenmodes are shown. **B:** When a given eigenmode is correlated to alpha power, it is roughly anti-correlated to beta power. To demonstrate this further, a scatter plot of all eigenmodes' alpha and beta power spatial correlation is shown. The r-statistic ( $r = -0.255, p < 0.0001$ ) of this correlation-of-correlations is highly significantly negative. **C** and **D** show the cortical surface renderings of the spatial pattern of the most spatially correlated eigenmode for alpha (#3) and beta (#33) respectively (indicated by \* in panel **A**). **E:** Per subject, the histogram of the correlation between the alpha band and beta band spatial correlation curves. It can be seen that for most subjects' alpha and beta band spatial correlation curves for the eigenmodes are in turn anti-correlated. **F:** Green histogram shows the distribution of spatial correlation achieved by the maximally correlated eigenmode with each subject's observed data in the alpha band. The blue histogram shows the spatial correlation achieved by the same eigenmodes with data in the beta band. This suggests that the eigenmode that is maximally correlated with alpha spatial pattern is in turn uncorrelated with the beta spatial pattern.

**Figure 6: Spatial distribution of the alpha band power across regions.** The spatial distribution of alpha band power is shown in cortical surface renderings, from top to bottom: the observed MEG pattern; the model pattern with 10 eigenmodes; the best matching eigenmode generated by eigenmode 14 only; the second best matching eigenmode



generated by eigenmode 19 only.

**Figure 7: Spatial distribution of beta band power across regions.** The spatial distribution of beta band power are shown in cortical surface renderings, from top to bottom: the observed MEG pattern; the model pattern with 5 eigenmodes; the best matching eigenmode generated by eigenmode 13 only; the second best matching eigenmode generated by eigenmode 22 only.

**Figure 8: Spatial correlation between model and observed data for all subjects.** The eigenmodes decomposed from individual connectomes are sorted by descending eigen values, and the spectral graph model's alpha and beta spatial correlation as these eigenmodes are cumulatively added together are shown in **A** and **B** respectively, the thin cyan and blue lines are subject specific spatial correlations, while the thick black and red line are average of all subjects. The distribution of simulated alpha and beta band maximum spatial correlation for all subjects are shown in **C** and **D**, the black curve is produced by the spectral graph model with individual connectomes and optimized parameters, the blue curve is produced by the spectral graph model with a connectome constructed by selecting 20% of the highest geodesic distance between ROI pairs and optimized parameters, the green curve is produced by the spectral graph model with 900 instances of 80% sparse randomly generated connectomes and optimized parameters, and the pink curve is produced by the neural mass model with individual connectomes and optimized global parameters. The NMM gives very poor prediction of the spatial pattern of alpha power ( $r$  distribution centered at 0). The random connectomes also appear to have some ability to capture these spatial patterns ( $r$  distribution centered at 0.4). This may be understood as a consequence of the implicit search within the random eigenmodes of the best-matching ones, which on average will give at least a few eigenmodes that look like MEG power purely by chance. The model evolved on the human connectome does the best in all cases, but markedly better in alpha compared to beta band.

## REFERENCES

1. Hagmann P, Cammoun L, Gigandet X, et al. Mapping the structural core of human cerebral cortex. *PLoS Biol.* 2008;6(7):1479-1493.
2. Iturria-Medina Y. Anatomical brain networks on the prediction of abnormal brain States. *Brain Connect.* 2013;3(1):1-21.
3. Honey CJ, Sporns O, Cammoun L, et al. Predicting human resting-state functional connectivity from structural connectivity. *Proc Natl Acad Sci U S A.* 2009;106(6):2035-2040.
4. Freeman WJ, Zhai J. Simulated power spectral density (PSD) of background electrocorticogram (ECoG). *Cogn Neurodyn.* 2008;3(1):97-103.
5. Liley DT, Alexander DM, Wright JJ, Aldous MD. Alpha rhythm emerges from large-scale networks of realistically coupled multicompartmental model cortical neurons. *Network.* 1999;10(1):79-92.
6. Roland PE, Hilgetag CC, Deco G. Tracing evolution of spatio-temporal dynamics of the cerebral cortex: cortico-cortical communication dynamics. *Front Syst Neurosci.* 2014;8:76.
7. Markounikau V, Igel C, Grinvald A, Jancke D. A dynamic neural field model of mesoscopic cortical activity captured with voltage-sensitive dye imaging. *PLoS Comput Biol.* 2010;6(9).
8. Schaffer ES, Ostojic S, Abbott LF. A complex-valued firing-rate model that approximates the dynamics of spiking networks. *PLoS Comput Biol.* 2013;9(10):e1003301.
9. Markram H. The blue brain project. *Nat Rev Neurosci.* 7(2):153-160.
10. Markram H, Muller E, Ramaswamy S, et al. Reconstruction and Simulation of Neocortical Microcircuitry. *Cell.* 2015;163(2):456-492.
11. Izhikevich EM, Edelman GM. Large-scale model of mammalian thalamocortical systems. *Proc Natl Acad Sci.* 2008;105(9):3593-3598.
12. Potjans TC, Diesmann M. The Cell-Type Specific Cortical Microcircuit: Relating Structure and Activity in a Full-Scale Spiking Network Model. *Cereb Cortex.* 2014;24(3):785-806.
13. Shimizu H, Haken H. Co-operative dynamics in organelles. *J Theor Biol.* 1983;104(2):261-273.
14. Mišić B, Sporns O, McIntosh AR. Communication efficiency and congestion of signal traffic in large-scale brain networks. *PLoS Comput Biol.* 2014;10(1):e1003427.
15. Mišić B, Betzel RF, Nematzadeh A, et al. Cooperative and Competitive Spreading Dynamics on the Human Connectome. *Neuron.* 2015;86(6):1518-1529.
16. Robinson PA, Rennie CJ, Rowe DL, O'Connor SC, Gordon E. Multiscale brain modelling. *Philos Trans R Soc Lond B Biol Sci.* 2005;360(1457):1043-1050.
17. Destexhe A, Sejnowski TJ. The Wilson-Cowan model, 36 years later. *Biol Cybern.* 2009;101(1):1-2.
18. Abdelnour F, Voss HU, Raj A. Network diffusion accurately models the relationship between structural and functional brain connectivity networks. *Neuroimage.* 2014;90:335-347.
19. Abdelnour F, Raj A, Dayan M, Devinsky O TT. Estimating function from structure in epileptics using graph diffusion model. In: *Proceedings of the IEEE International Symposium on Biomedical Imaging.* ; 2015:Paper ID 528.
20. Nakagawa TT, Woolrich M, Luckhoo H, et al. How delays matter in an oscillatory whole-brain spiking-neuron network model for MEG alpha-rhythms at rest. *Neuroimage.* 2014;87:383-394.
21. Jirsa VK, Jantzen KJ, Fuchs A, Kelso JAS. Spatiotemporal forward solution of the EEG

- and MEG using network modeling. *IEEE Trans Med Imaging*. 2002;21(5):493-504.
22. Deco G, Senden M, Jirsa V. How anatomy shapes dynamics: a semi-analytical study of the brain at rest by a simple spin model. *Front Comput Neurosci*. 2012;6:68.
  23. Achard S, Salvador R, Whitcher B, Suckling J, Bullmore E. A resilient, low-frequency, small-world human brain functional network with highly connected association cortical hubs. *J Neurosci*. 2006;26(1):63-72.
  24. Bullmore E, Bullmore E, Sporns O, Sporns O. Complex brain networks: graph theoretical analysis of structural and functional systems. *Nat Rev Neurosci*. 2009;10(3):186-198.
  25. Strogatz SH. Exploring complex networks. *Nature*. 2001;410(6825):268-276.
  26. van den Heuvel MP, Mandl RCW, Kahn RS, Hulshoff Pol HE. Functionally linked resting-state networks reflect the underlying structural connectivity architecture of the human brain. *Hum Brain Mapp*. 2009;30(10):3127-3141.
  27. Hermundstad AM, Bassett DS, Brown KS, et al. Structural foundations of resting-state and task-based functional connectivity in the human brain. *Proc Natl Acad Sci*. 2013;110(15):6169-6174.
  28. Rubinov M, Sporns O, van Leeuwen C, Breakspear M. Symbiotic relationship between brain structure and dynamics. *BMC Neurosci*. 2009;10(1):55.
  29. Ghosh A, Rho Y, McIntosh AR, Kötter R, Jirsa VK. Cortical network dynamics with time delays reveals functional connectivity in the resting brain. *Cogn Neurodyn*. 2008;2(2):115-120.
  30. Abdelnour F, Voss HU, Raj A. Network diffusion accurately models the relationship between structural and functional brain connectivity networks. *Neuroimage*. 2014;90:335-347.
  31. Abdelnour F, Dayan M, Devinsky O, Thesen T, Raj A. Functional brain connectivity is predictable from anatomic network's Laplacian eigen-structure. *Neuroimage*. 2018;172:728-739.
  32. Park H-J, Friston K. Structural and Functional Brain Networks: From Connections to Cognition. *Science (80- )*. 2013;342(6158):1238411-1238411.
  33. He BJ, Zempel JM, Snyder AZ, Raichle ME. The temporal structures and functional significance of scale-free brain activity. *Neuron*. 2010;66(3):353-369.
  34. El Boustani S, Destexhe A. A master equation formalism for macroscopic modeling of asynchronous irregular activity states. *Neural Comput*. 2009;21(1):46-100.
  35. Wilson HR, Cowan JD. A mathematical theory of the functional dynamics of cortical and thalamic nervous tissue. *Kybernetik*. 1973;13(2):55-80.
  36. David O, Friston KJ. A neural mass model for MEG/EEG: Coupling and neuronal dynamics. *Neuroimage*. 2003;20(3):1743-1755.
  37. Xie X, Kuceyeski A, Shah SA, Schiff ND, Nagarajan S, Raj A. Identifiability in connectome based neural mass models. *bioRxiv*. November 2018:480012.
  38. Larsen R, Nielsen M, Sparring J, Zhang F, Hancock E. *Medical Image Computing and Computer-Assisted Intervention – MICCAI 2006*. Vol 4191. (Larsen R, Nielsen M, Sparring J, eds.). Berlin, Heidelberg: Springer Berlin Heidelberg; 2006.
  39. Kondor, Lafferty. Diffusion kernels on graphs and other discrete structures. 2002.
  40. Auffarth B. Spectral graph clustering. *Univ Barcelona, course Rep*. 2007:1-12.
  41. A.Ng, M. Jordan YW. On Spectral Clustering: Analysis and an algorithm. *Adv Neural Inf Process Syst*. 2002:849-856.
  42. Galán RF. On How Network Architecture Determines the Dominant Patterns of Spontaneous Neural Activity. Sporns O, ed. *PLoS One*. 2008;3(5):e2148.
  43. Goni J, van den Heuvel MP, Avena-Koenigsberger A, et al. Resting-brain functional connectivity predicted by analytic measures of network communication. *Proc Natl Acad Sci*. 2014;111(2):833-838.

44. Wang MB, Owen JP, Mukherjee P, Raj A. Brain network eigenmodes provide a robust and compact representation of the structural connectome in health and disease. Jbabdi S, ed. *PLoS Comput Biol*. 2017;13(6):e1005550.
45. Abdelnour F, Dayan M, Devinsky O, Thesen T, Raj A. Estimating brain's functional graph from the structural graph's Laplacian. In: Papadakis M, Goyal VK, Van De Ville D, eds. *SPIE Optical Engineering + Applications*. International Society for Optics and Photonics; 2015:95970N.
46. Atasoy S, Donnelly I, Pearson J. Human brain networks function in connectome-specific harmonic waves. *Nat Commun*. 2016;7:10340.
47. Abdelnour F, Mueller S, Raj A. Relating Cortical Atrophy in Temporal Lobe Epilepsy with Graph Diffusion-Based Network Models. *PLoS Comput Biol*. 2015;11(10).
48. Abdelnour F, Raj A, Devinsky O, Thesen T. Network Analysis on Predicting Mean Diffusivity Change at Group Level in Temporal Lobe Epilepsy. *Brain Connect*. 2016;6(8):607-620.
49. Raj A, Kuceyeski A, Weiner M. A network diffusion model of disease progression in dementia. *Neuron*. 2012;73(6):1204-1215.
50. Muldoon SF, Pasqualetti F, Gu S, et al. Stimulation-Based Control of Dynamic Brain Networks. Hilgetag CC, ed. *PLoS Comput Biol*. 2016;12(9):e1005076.
51. Nunez PL, Srinivasan R. A theoretical basis for standing and traveling brain waves measured with human EEG with implications for an integrated consciousness. *Clin Neurophysiol*. 2006;117(11):2424-2435.
52. Vijayan S, Ching S, Purdon PL, Brown EN, Kopell NJ. Thalamocortical mechanisms for the anteriorization of  $\alpha$  rhythms during propofol-induced unconsciousness. *J Neurosci*. 2013;33(27):11070-11075.
53. David O, Friston KJ. A neural mass model for MEG/EEG: coupling and neuronal dynamics. *Neuroimage*. 2003;20(3):1743-1755.
54. van Rotterdam A, Lopes da Silva FH, van den Ende J, Viergever MA, Hermans AJ. A model of the spatial-temporal characteristics of the alpha rhythm. *Bull Math Biol*. 1982;44(2):283-305.
55. Liley DTJ, Cadusch PJ, Dafilis MP. A spatially continuous mean field theory of electrocortical activity. *Netw Comput Neural Syst*. 2002;13(1):67-113.
56. Spiegler A, Jirsa V. Systematic approximations of neural fields through networks of neural masses in the virtual brain. *Neuroimage*. 2013;83:704-725.
57. Nunez PL. A study of origins of the time dependencies of scalp EEG: i--theoretical basis. *IEEE Trans Biomed Eng*. 1981;28(3):271-280. <http://www.ncbi.nlm.nih.gov/pubmed/7228073>. Accessed October 5, 2015.
58. Daunizeau J, David O, Stephan KE. Dynamic causal modelling: A critical review of the biophysical and statistical foundations. *Neuroimage*. 2011;58(2):312-322.
59. Friston KJ, Preller KH, Mathys C, et al. Dynamic causal modelling revisited. *Neuroimage*. 2017;(February):0-1.
60. Pinotsis DA, Hansen E, Friston KJ, Jirsa VK. Anatomical connectivity and the resting state activity of large cortical networks. *Neuroimage*. 2013;65:127-138.
61. Razi A, Kahan J, Rees G, Friston KJ. Construct validation of a DCM for resting state fMRI. *Neuroimage*. 2015;106:1-14.
62. Pinotsis DA, Geerts JP, Pinto L, et al. Linking canonical microcircuits and neuronal activity: Dynamic causal modelling of laminar recordings. *Neuroimage*. 2017;146(September 2016):355-366.
63. Daunizeau J, Kiebel SJ, Friston KJ. Dynamic causal modelling of distributed electromagnetic responses. *Neuroimage*. 2009;47(2):590-601.
64. Park HJ, Friston KJ, Pae C, Park B, Razi A. Dynamic effective connectivity in resting state fMRI. *Neuroimage*. 2018;180(May 2017):594-608.

65. Van de Steen F, Almgren H, Razi A, Friston K, Marinazzo D. Dynamic causal modelling of fluctuating connectivity in resting-state EEG. *Neuroimage*. 2019;189(May 2018):476-484.
66. Preti MG, Bolton TA, Van De Ville D. The dynamic functional connectome: State-of-the-art and perspectives. *Neuroimage*. 2017;160(December 2016):41-54.
67. Razi A, Seghier ML, Zhou Y, et al. Large-scale DCMs for resting-state fMRI. *Netw Neurosci*. 2017;1(3):222-241.
68. Frässle S, Lomakina EI, Razi A, Friston KJ, Buhmann JM, Stephan KE. Regression DCM for fMRI. *Neuroimage*. 2017;155(February):406-421.
69. Frässle S, Lomakina EI, Kasper L, et al. A generative model of whole-brain effective connectivity. *Neuroimage*. 2018;179(May):505-529.
70. Ferezou I, Haiss F, Gentet LJ, Aronoff R, Weber B, Petersen CCH. Spatiotemporal dynamics of cortical sensorimotor integration in behaving mice. *Neuron*. 2007;56(5):907-923.
71. Polack P-O, Contreras D. Long-range parallel processing and local recurrent activity in the visual cortex of the mouse. *J Neurosci*. 2012;32(32):11120-11131.
72. Fischl B, Salat DH, Busa E, et al. Whole Brain Segmentation : Automated Labeling of Neuroanatomical Structures in the Human Brain. *Neuron*. 2002;33:341-355.
73. Owen JP, Li Y-O, Ziv E, et al. The structural connectome of the human brain in agenesis of the corpus callosum. *Neuroimage*. 2013;70:340-355.
74. Jenkinson M, Beckmann CF, Behrens TEJ, Woolrich MW, Smith SM. FSL. *Neuroimage*. 2012;62(2):782-790.
75. Wipf DP, Owen JP, Attias HT, Sekihara K, Nagarajan SS. Robust Bayesian estimation of the location, orientation, and time course of multiple correlated neural sources using MEG. *Neuroimage*. 2010;49(1):641-655.
76. Zumer JM, Attias HT, Sekihara K, Nagarajan SS. Probabilistic algorithms for MEG/EEG source reconstruction using temporal basis functions learned from data. *Neuroimage*. 2008;41(3):924-940.
77. Jerbi K, Baillet S, Mosher JC, Nolte G, Garnero L, Leahy RM. Localization of realistic cortical activity in MEG using current multipoles. *Neuroimage*. 2004;22(2):779-793.
78. Dalal SS, Zumer JM, Agrawal V, Hild KE, Sekihara K, Nagarajan SS. NUTMEG: a neuromagnetic source reconstruction toolbox. *Neurol Clin Neurophysiol*. 2004;2004:52.  
<http://www.pubmedcentral.nih.gov/articlerender.fcgi?artid=1360185&tool=pmcentrez&rendertype=abstract>. Accessed October 20, 2015.
79. Kirkpatrick S, Gelatt CD, Vecchi MP. Optimization by simulated annealing. *Science*. 1983;220(4598):671-680.

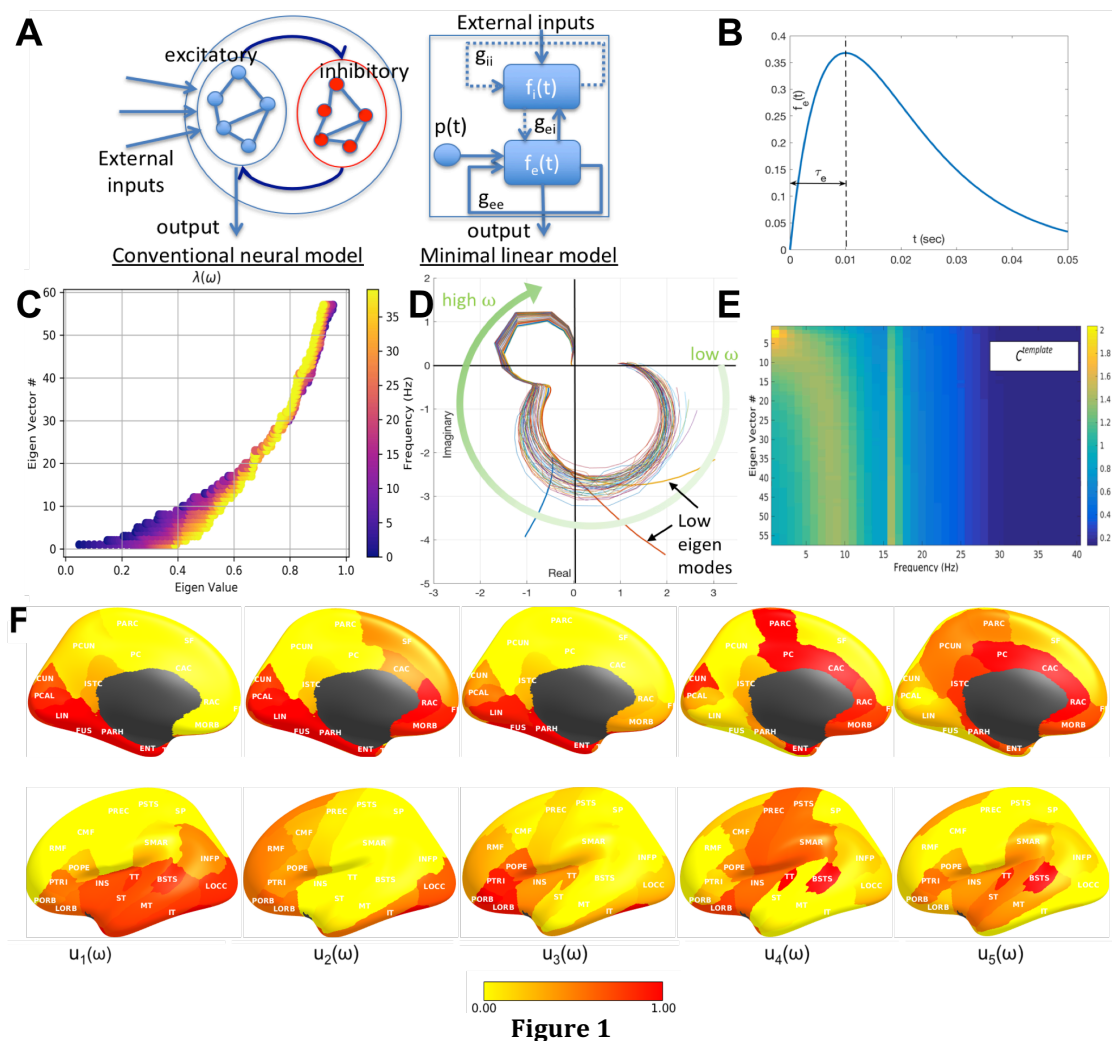

Figure 1

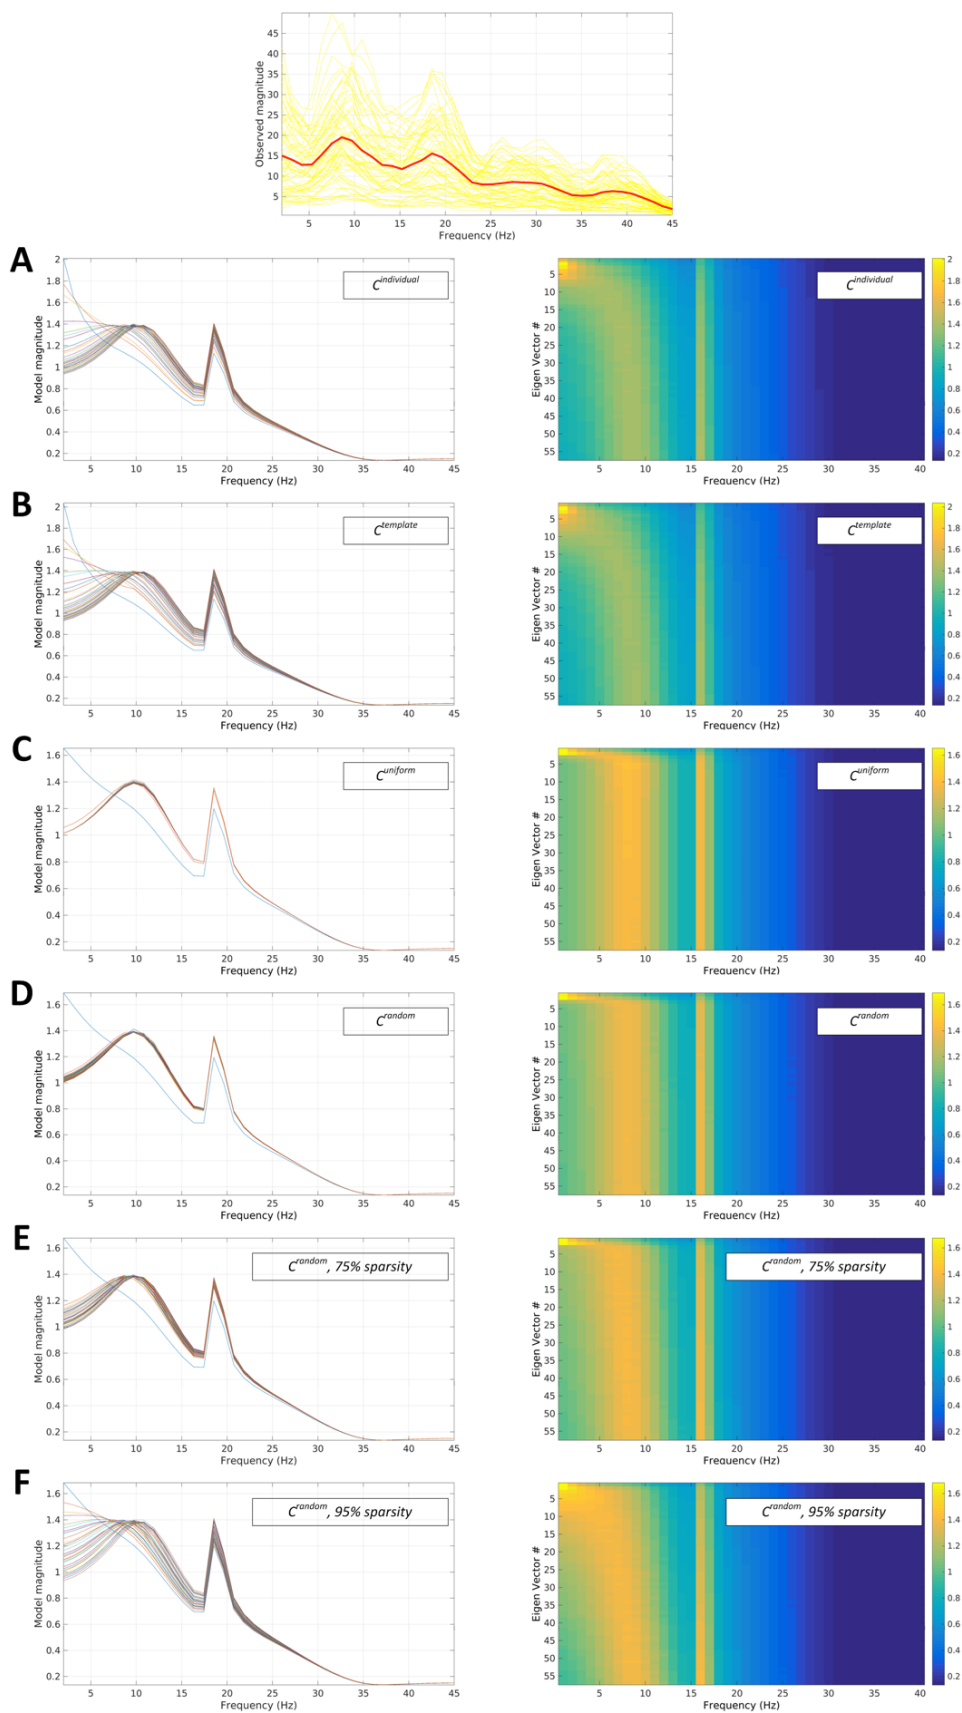

Figure 2

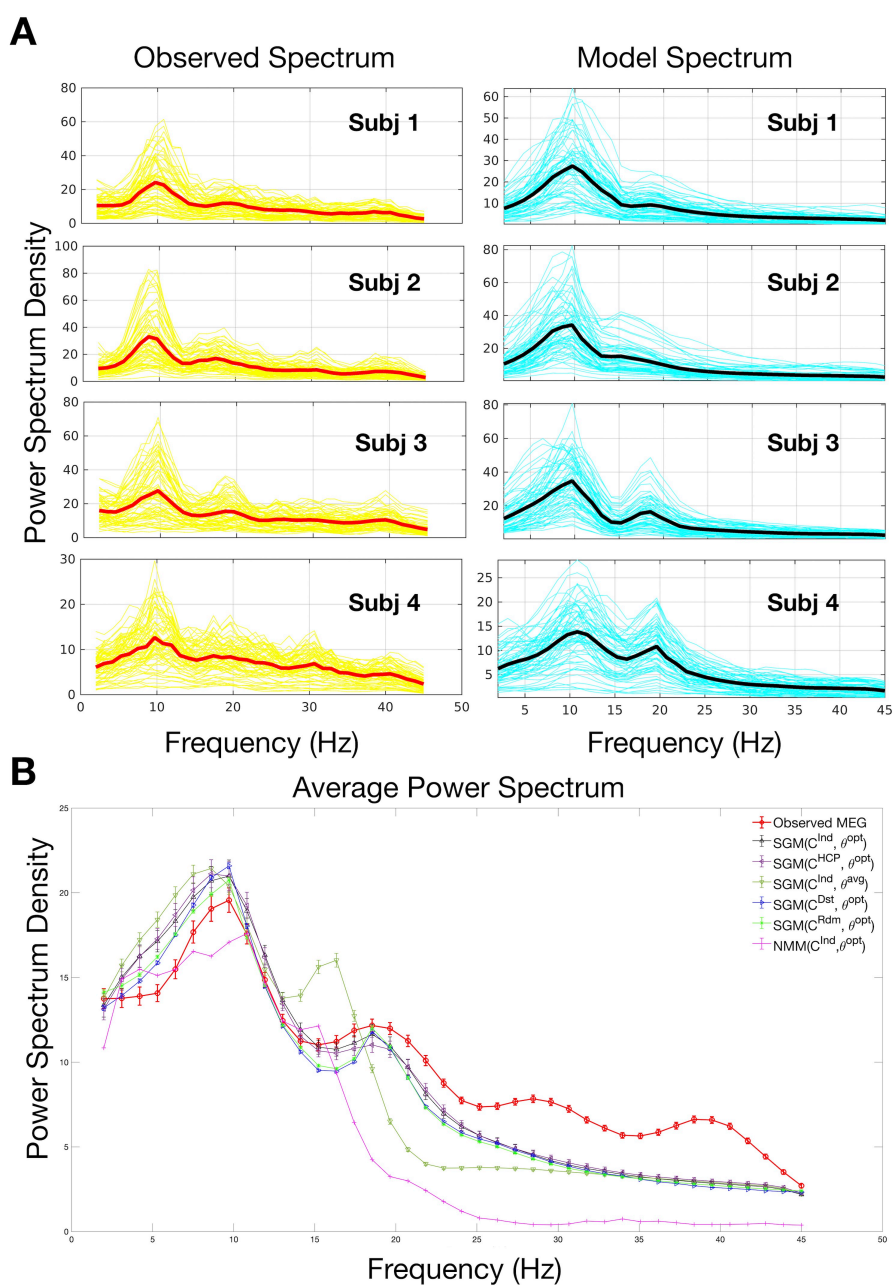

Figure 3



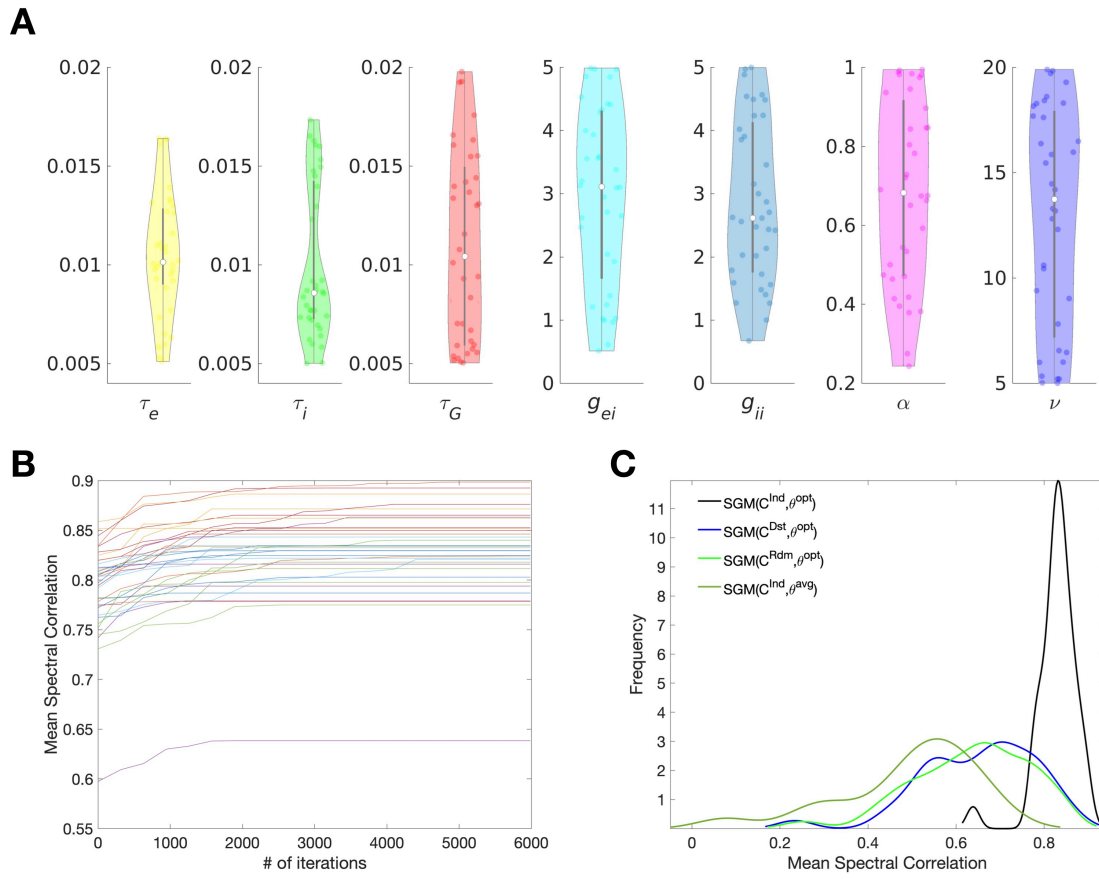

Figure 4

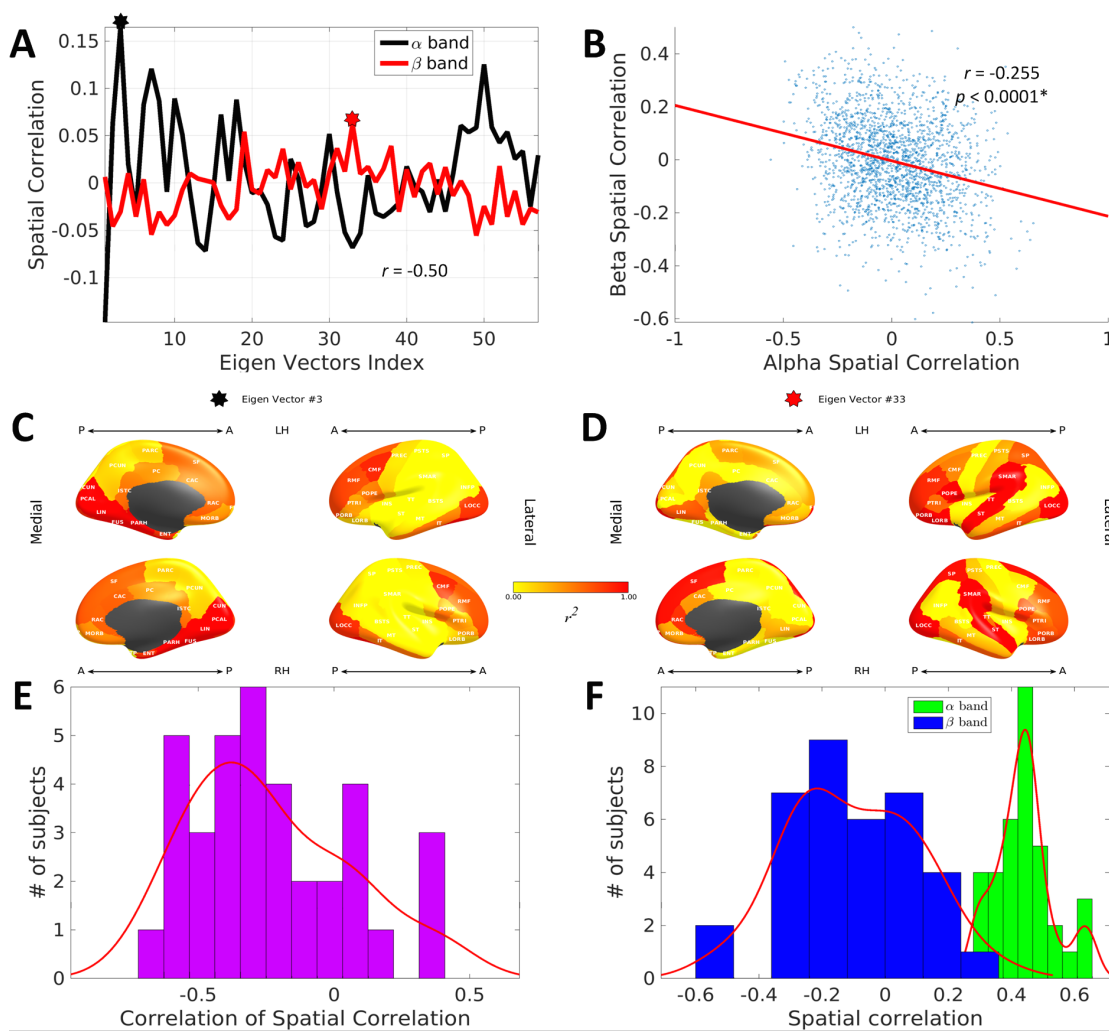

Figure 5

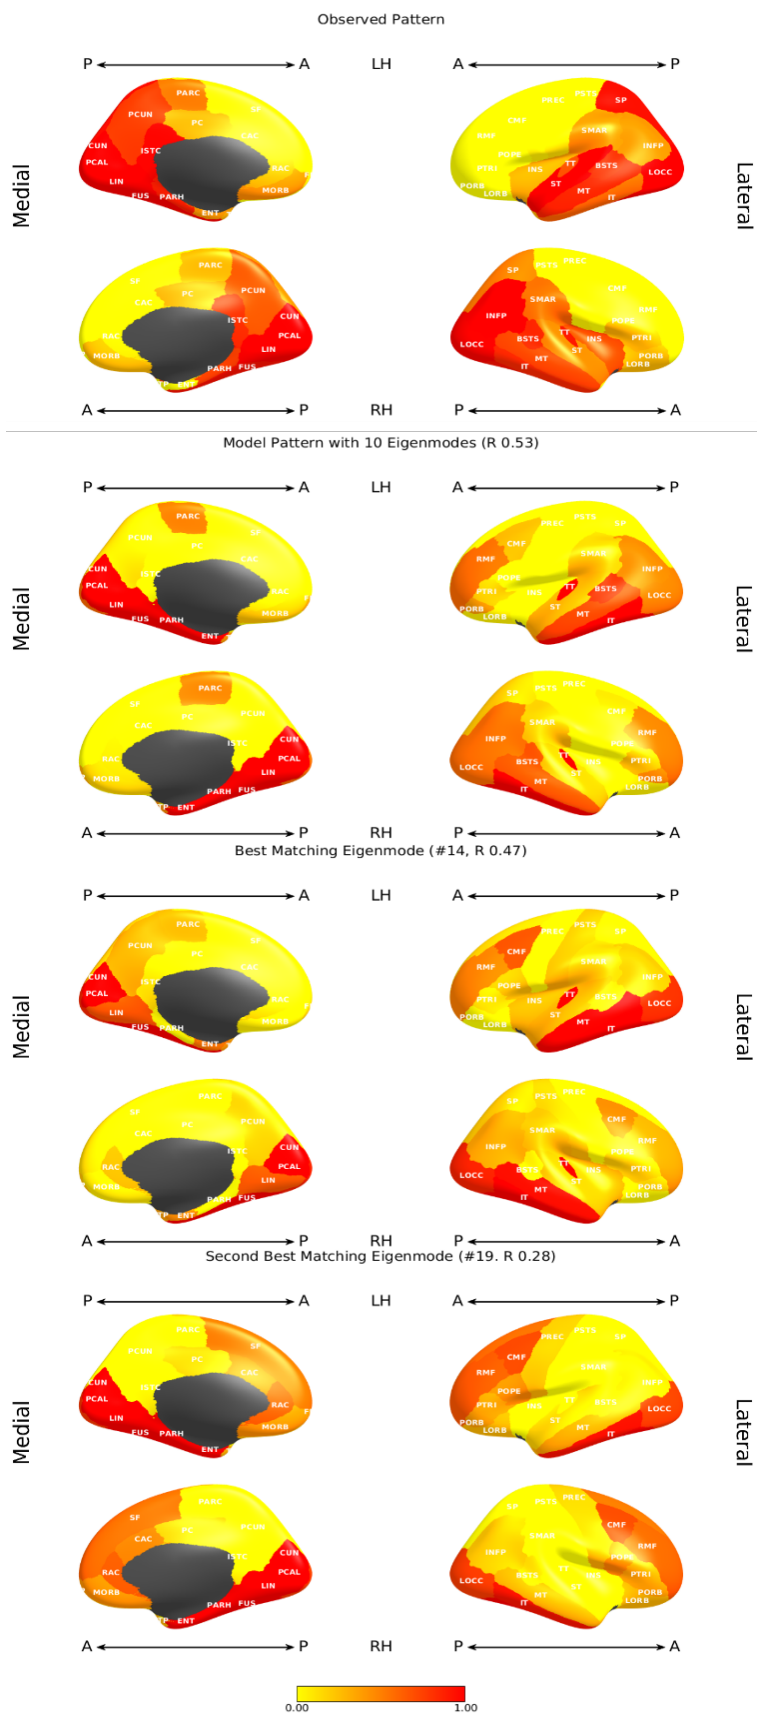

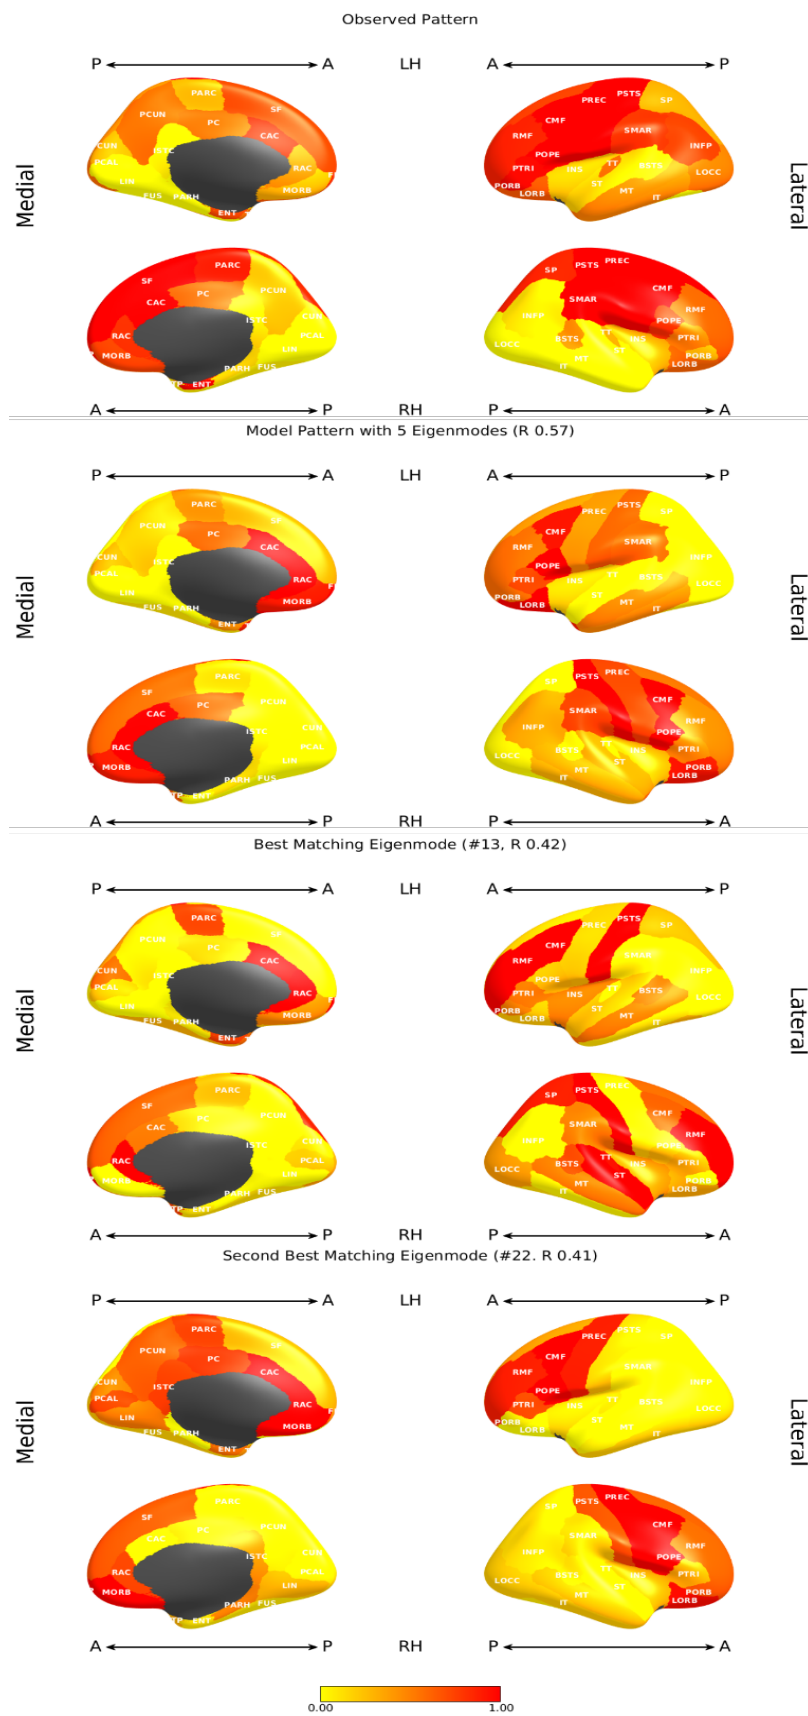

**Figure 7.**

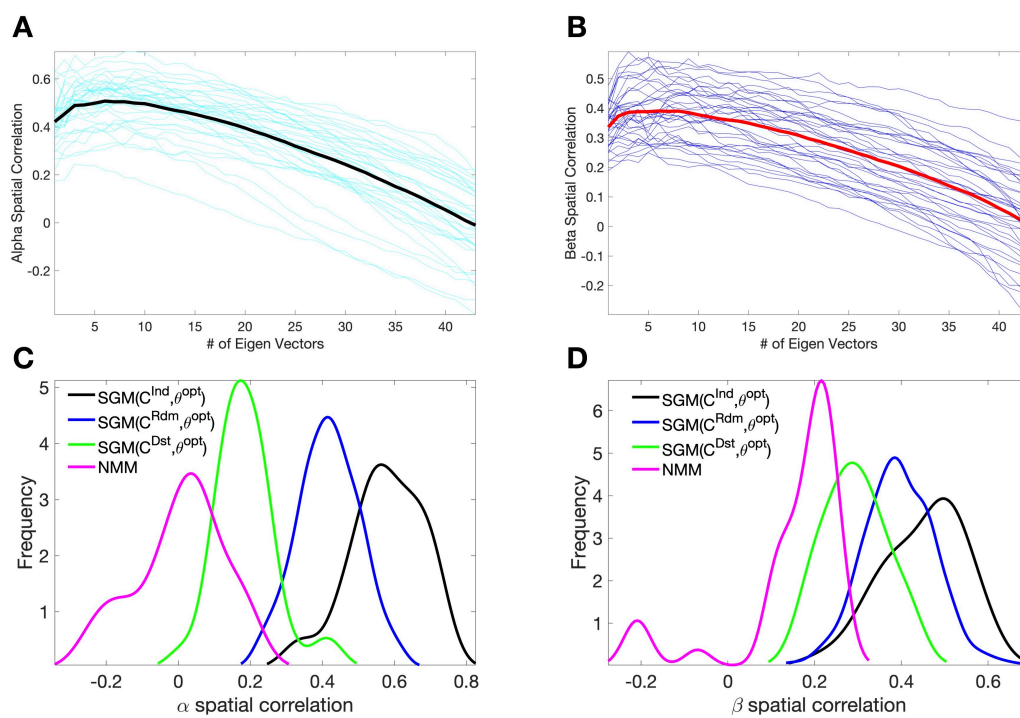

Figure 8
